# Supplementary material for: Interphase synergistic effects of dynamic bonds in multiphase thermoplastic elastomers
Source: Royal Society of Chemistry journal article supplement (doi:10.1039/c9ta07522d), 2019-01-01
Supplement: c9ta07522d1.pdf [file c9ta07522d1.pdf]

**Electronic Supplementary Information for**

**Interphase synergistic effects of dynamic bonds in multiphase thermoplastic elastomers**

Saki Kawana<sup>1</sup>, Shintaro Nakagawa<sup>1</sup>, Shuya Nakai<sup>1</sup>, Minami Sakamoto<sup>1,2</sup>, Youichi Ishii<sup>2</sup>,  
and Naoko Yoshie<sup>1\*</sup>

1: *Institute of Industrial Science, The University of Tokyo, 4-6-1 Komaba, Meguro-ku, Tokyo 153-8505  
Japan*

2: *Department of Applied Chemistry, Faculty of Science and Engineering, Chuo University, 1-13-27  
Kasuga, Bunkyo-ku, Tokyo 112-8551 Japan*

\* Corresponding author, E-mail: yoshie@iis.u-tokyo.ac.jp

## 14 Experimental

### 15 Materials.

16 5-phenyl-2-norbornene (PhN)<sup>1</sup>, dodecanyl 5-norbornene-2-carboxylate (DN)<sup>2</sup>, and protected  
17 UPy monomer (pUN), [(2*S*)-bicyclo[2.2.1]hept-5-en-2-ylmethyl-6-(3-(4-methyl-6-(2-  
18 nitrobenzyloxy)pyrimidin-2-yl)ureido)hexylcarbamate]<sup>3</sup>, were synthesized according to the literatures.  
19 The <sup>1</sup>H NMR spectra of these monomers are shown in Fig. S1. Dichloromethane (DCM) (Wako, Japan),  
20 ethyl vinyl ether (Tokyo Chemical Industry, Japan), Grubbs' 3rd generation catalyst (Sigma Aldrich,  
21 USA), and methanol (Wako, Japan) were used as received.

22

### 23 General procedure for the synthesis of triblock copolymers.

24 Here we describe the synthetic procedure for TPE(5-10-5) as an example. The other triblock  
25 copolymers were synthesized similarly with different ratios of the monomers in each step which have  
26 been listed in Table 1 in the main text. First, Grubbs' 3rd generation catalyst 4.79 mg (5.41 μmol, 1 eq.)  
27 was weighed in a 50 mL glass vial equipped with a rubber septum. The vial was cooled in an ice bath  
28 and purged with nitrogen. DCM 8 mL was added through the septum to dissolve the catalyst. To this  
29 vial a solution of PhN 50.7 mg (0.298 mmol, 55 eq.) and pUN 15.0 mg (0.027 mmol, 5.0 eq.) in DCM  
30 4 mL was swiftly injected with vigorous stirring. After stirring for 5 min, a solution of D 780 mg (2.54  
31 mmol, 470 eq.) and pUN 29.9 mg (0.0541 mmol, 10 eq.) in DCM 8 mL was injected and stirred for 30  
32 min. In the final polymerization step, a solution of PhN 50.7 mg (0.298 mmol, 55 eq.) and pUN 15.0  
33 mg (0.027 mmol, 5.0 eq.) in DCM 4 mL was injected into the vial and the solution was stirred for  
34 another 5 min. Then the reaction was quenched by adding ~ 20 drops of ethyl vinyl ether followed by  
35 stirring for 2 h at room temperature. Precipitation in excess methanol yielded brown rubbery solid.  
36 Deprotection of UPy moiety was carried out by irradiating UV light with the wavelength of 365 nm  
37 from a UV-LED curing device (8332A controller with AC8361 LED head, CCS, Japan) to a dilute  
38 chloroform solution of the protected polymer (ca. 0.3wt%) for 3 h. The deprotected polymer was  
39 isolated by concentrating the solution by a rotavapor, precipitating in excess methanol, and drying in  
40 vacuum. The UV deprotection process was not done to TPE(0-0-0) without UPy moiety.

41

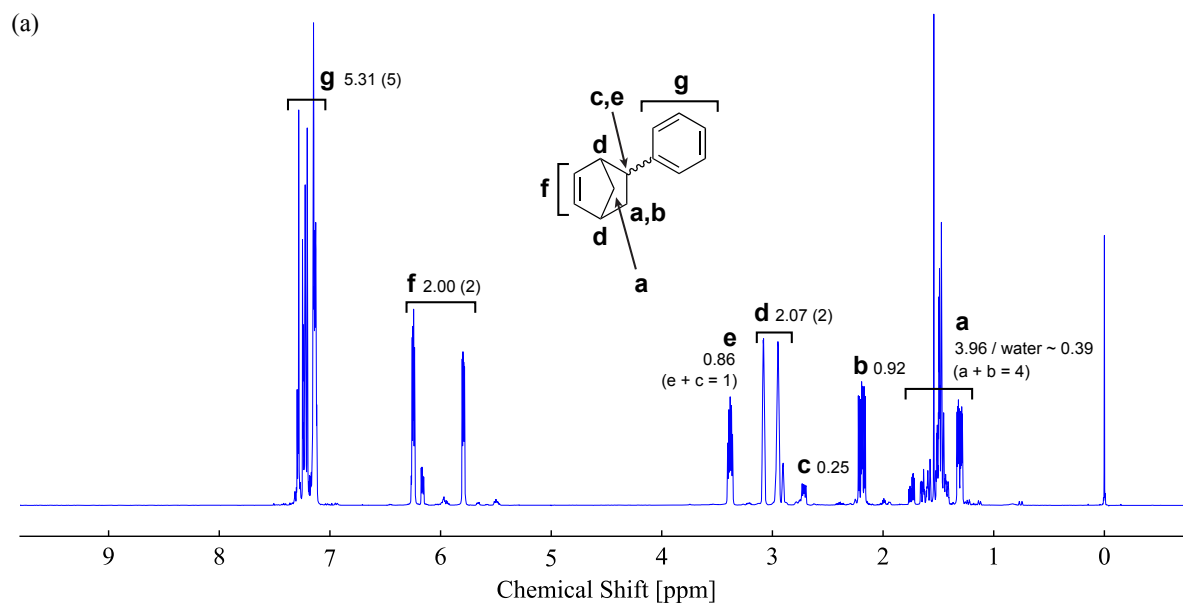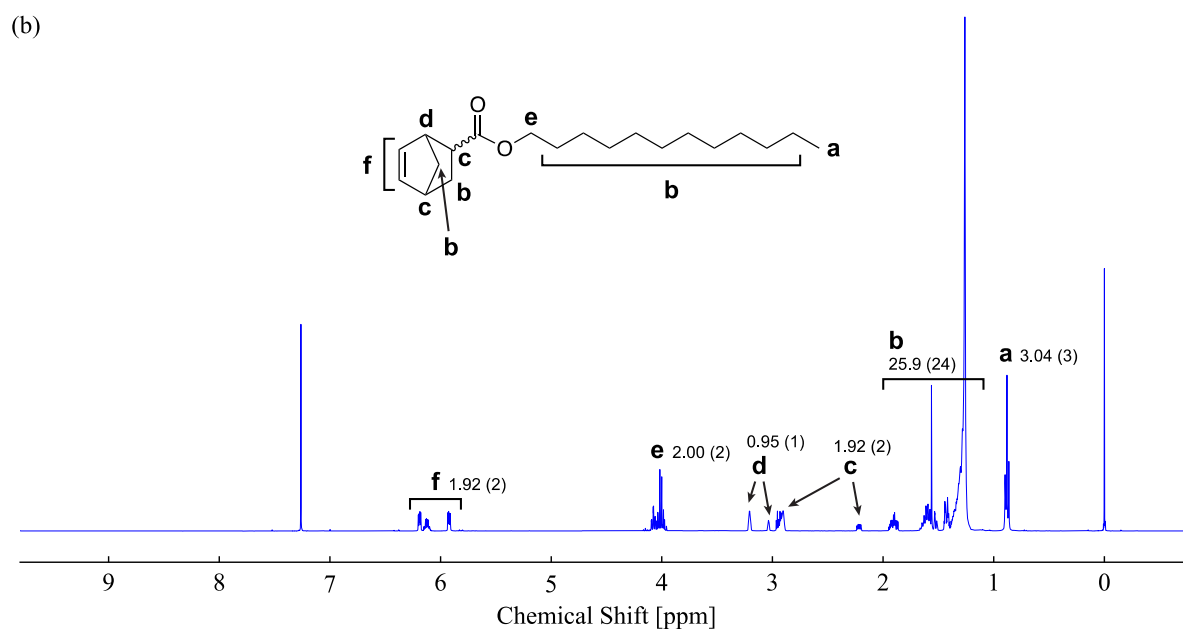

Fig. S1.  $^1\text{H}$  NMR spectrum of PhN (a), DN (b), and pUN (c) ( $\text{CDCl}_3$ , 400 MHz). Numbers indicate observed integral intensity, together with the corresponding theoretical values in the parentheses. The peak assignment on DN (b) was done according to the literature<sup>4</sup>.

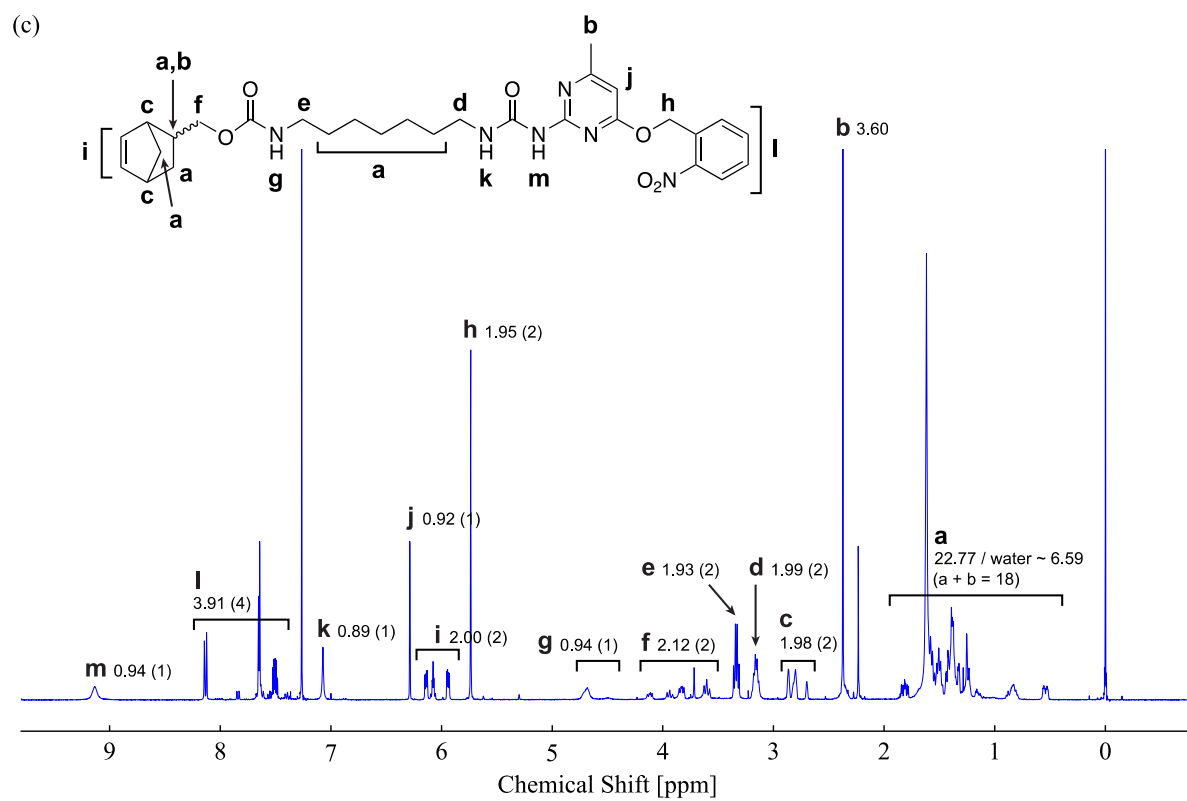

Fig. S1. (continued)

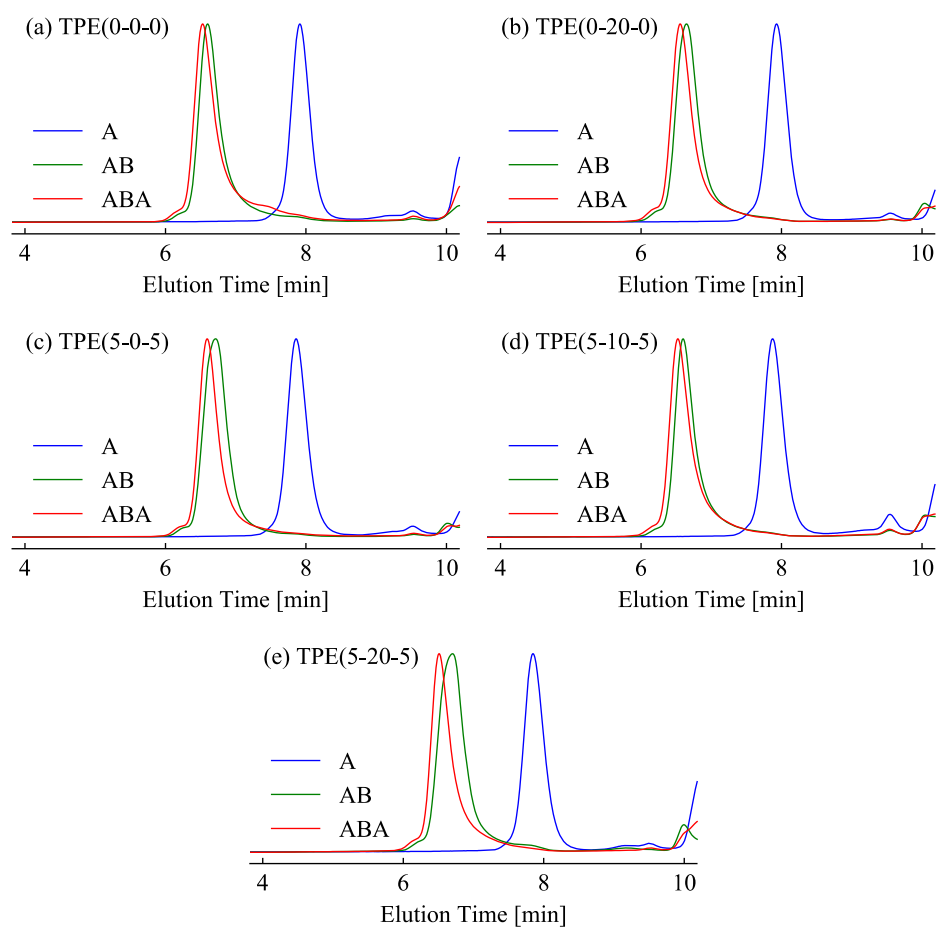

Fig. S2. SEC chromatograms of the reaction mixture at the end of each step of block copolymerization for TPE(0-0-0) (a), TPE(0-20-0) (b), TPE(5-0-5) (c), TPE(5-10-5) (d), and TPE(5-20-5) (e). The measurements were performed on the samples before UV deprotection of UPy moiety using an SEC column (GMHHR-M, Tosoh, Japan) and 0.5% triethylamine/tetrahydrofuran as an eluent.

59 Table S1. Results of the SEC analysis of the reaction mixture at the end of each polymerization step <sup>a</sup>.

| Code        | $M_p$ (SEC) <sup>b</sup> [kg mol <sup>-1</sup> ] |     |     | $M_n$ (SEC) <sup>c</sup> [kg mol <sup>-1</sup> ] |     |     | $M_w/M_n$ |      |      |
|-------------|--------------------------------------------------|-----|-----|--------------------------------------------------|-----|-----|-----------|------|------|
|             | A                                                | AB  | ABA | A                                                | AB  | ABA | A         | AB   | ABA  |
| TPE(0-0-0)  | 14                                               | 198 | 232 | 13                                               | 112 | 103 | 1.09      | 1.61 | 1.92 |
| TPE(0-20-0) | 13                                               | 178 | 219 | 13                                               | 119 | 132 | 1.09      | 1.50 | 1.57 |
| TPE(5-0-5)  | 15                                               | 154 | 201 | 14                                               | 118 | 116 | 1.11      | 1.37 | 1.63 |
| TPE(5-10-5) | 15                                               | 199 | 236 | 14                                               | 121 | 136 | 1.09      | 1.50 | 1.56 |
| TPE(5-20-5) | 16                                               | 157 | 243 | 14                                               | 113 | 140 | 1.10      | 2.12 | 1.56 |

60 a: Characterization was performed on the samples before deprotection of UPy. b: Apparent peak  
61 molecular weight calibrated by polystyrene standards. c: Apparent number-averaged molecular  
62 weight calibrated by polystyrene standards.

63

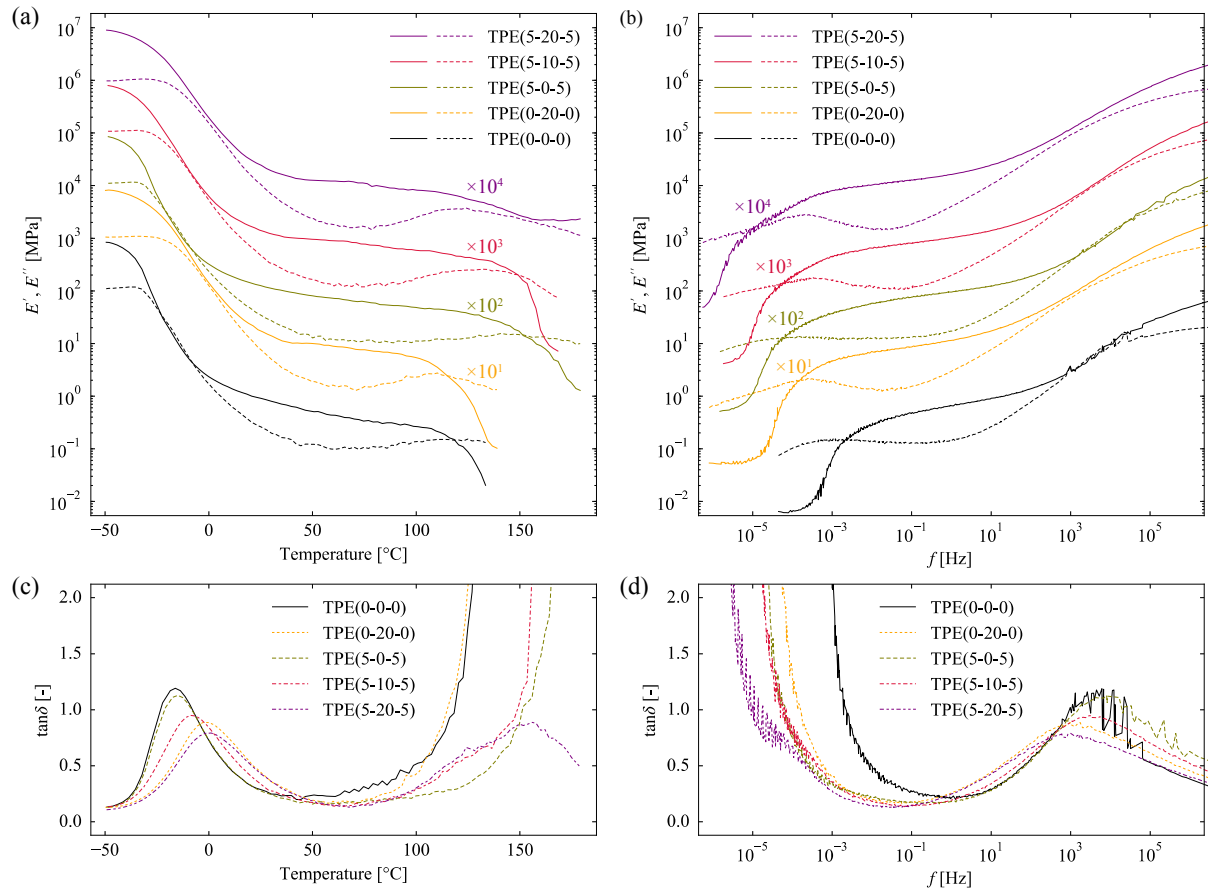

Fig. S3. Linear viscoelastic spectra of the TPEs. Storage modulus  $E'$  and loss modulus  $E''$  at  $f = 10$  Hz as a function of temperature (a) and master curves of  $E'$  and  $E''$  as a function of frequency  $f$  constructed at  $T_{\text{ref}} = 25$  °C (b). The curves have been vertically shifted by an indicated factor for the sake of legibility. Loss tangent as a function of temperature (c) and  $f$  (d).

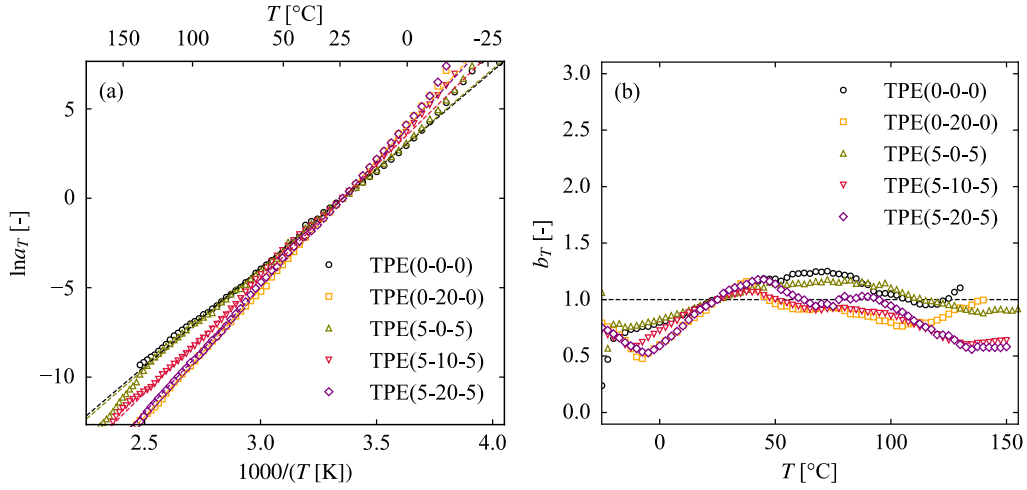

Fig. S4. Horizontal shift factor  $a_T$  (a) and vertical shift factor  $b_T$  (b) used to construct the master curves in Fig. S3.  $a_T$  is displayed as an Arrhenius plot and the dashed lines are the results of linear fitting in the range of  $50\text{ }^{\circ}\text{C} \leq T \leq 100\text{ }^{\circ}\text{C}$ , the slope of which yields the apparent activation energy  $E_a$ . The horizontal dashed line in panel b indicates  $b_T = 1$  (= no vertical shifting).

Table S2. Linear viscoelastic properties of the TPEs.

| Code        | $T_1^a$ [ $^{\circ}\text{C}$ ] | $T_2^b$ [ $^{\circ}\text{C}$ ] | $E_a^c$ [ $\text{kJ mol}^{-1}$ ] |
|-------------|--------------------------------|--------------------------------|----------------------------------|
| TPE(0-0-0)  | -16                            | 118                            | 92                               |
| TPE(0-20-0) | -1                             | 115                            | 119                              |
| TPE(5-0-5)  | -15                            | 152                            | 93                               |
| TPE(5-10-5) | -8                             | 148                            | 106                              |
| TPE(5-20-5) | 0                              | - <sup>d</sup>                 | 116                              |

a: Temperature at the peak of  $\tan \delta$  measured at  $f = 10$  Hz. b: Temperature at the crossover of  $E'$  and  $E''$ . c: Apparent activation energy estimated from the horizontal shift factor in the temperature range of  $50\text{ }^{\circ}\text{C} \leq T \leq 100\text{ }^{\circ}\text{C}$ . d:  $T_2$  could not be determined because  $E'$  did not become lower than  $E''$  even at the highest temperature employed.



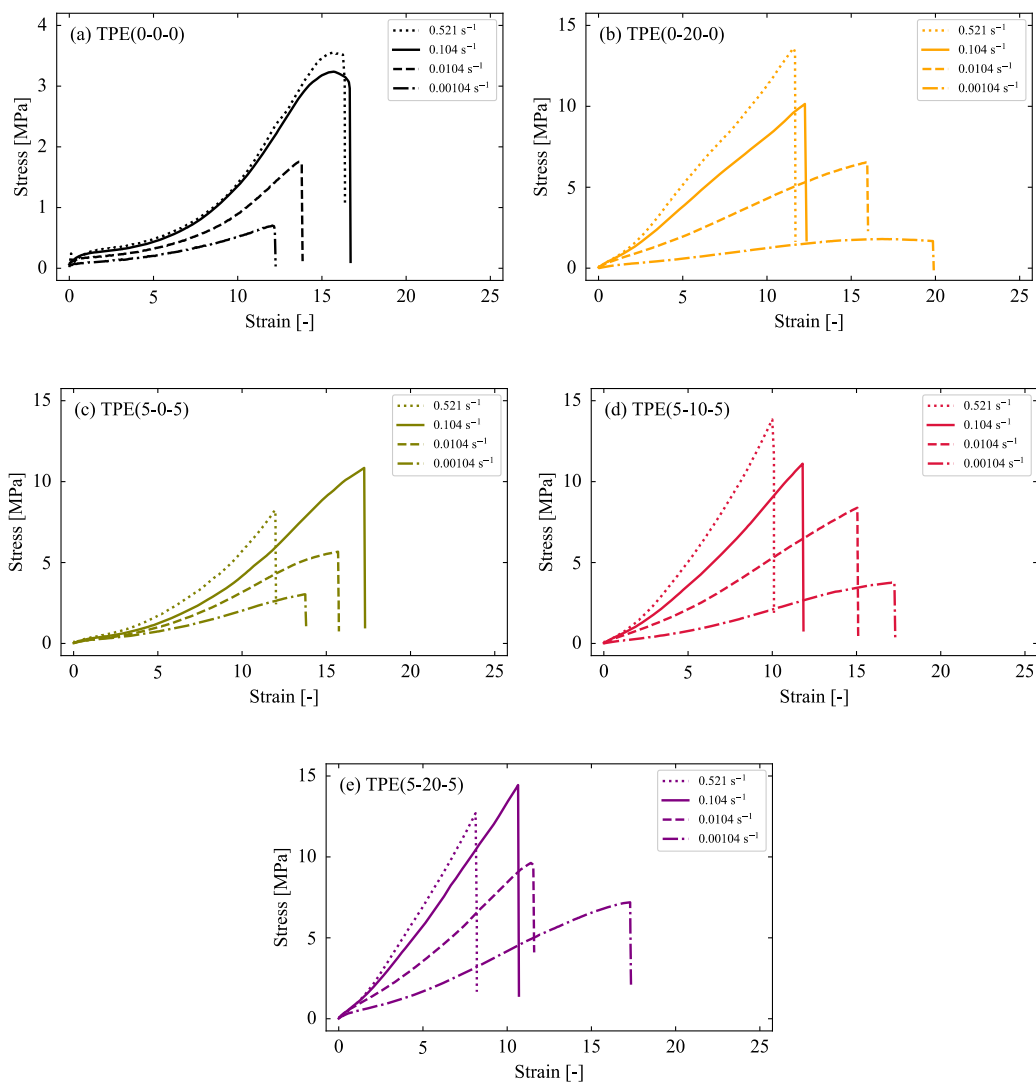

Fig. S5. Stress-strain curves of the TPEs measured at different strain rates for TPE(0-0-0) (a), TPE(0-20-0) (b), TPE(5-0-5) (c), TPE(5-10-5) (d), and TPE(5-20-5) (e).

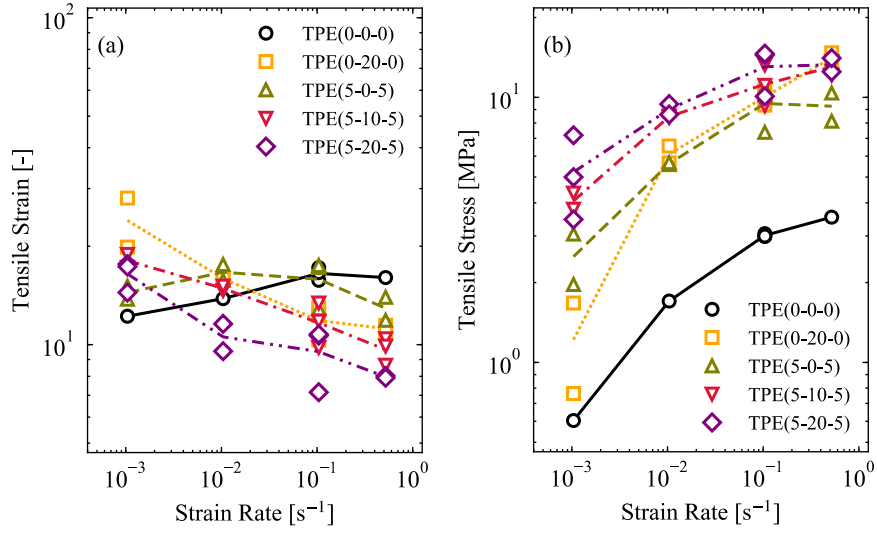

Fig. S6. Strain rate dependence of the tensile strain (a) and tensile stress (b). Multiple data points at the same strain rate are those from different test pieces. The lines connect the averages over the test pieces at each strain rate.

Table S3. Prescribed strain and resulting work in the 1st loading for the TPE samples.

| Code        | $\varepsilon_c$ | $W_1$ [MJ m $^{-3}$ ] |
|-------------|-----------------|-----------------------|
| TPE(0-0-0)  | 12.60           | 9.1                   |
| TPE(0-20-0) | 5.30            | 9.5                   |
| TPE(5-0-5)  | 8.45            | 11.0                  |
| TPE(5-10-5) | 5.00            | 10.5                  |
| TPE(5-20-5) | 4.40            | 9.9                   |

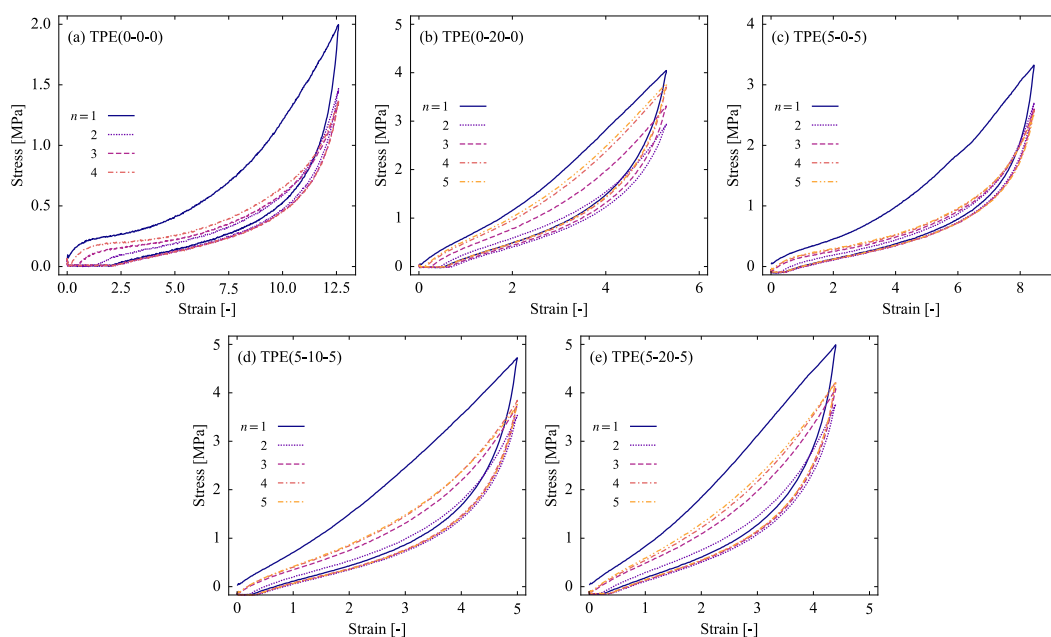

97

98 Fig. S7. Stress-strain curves in cyclic tensile tests for TPE(0-0-0) (a), TPE(0-20-0) (b), TPE(5-0-5) (c),  
 99 TPE(0-10-0) (d), and TPE(5-20-5) (e). Data at  $n = 5$  for TPE(0-0-0) is not shown because the sample  
 100 ruptured during the loading process.

101

## 102 References

- 103 1 A. N. Artemov, E. V. Sazonova, M. V. Revin, K. V. Rybkin, M. A. Lazarev and V. I. Faerman,  
 104 [2+4] Cycloaddition of  $\eta^6$ -(styrene)chromium tricarbonyl and conjugated dienes, *Russ. Chem. Bull.*,  
 105 2011, **60**, 2103–2106.  
 106 2 S. Yoshida, H. Ejima and N. Yoshie, Tough Elastomers with Superior Self-Recoverability Induced  
 107 by Bioinspired Multiphase Design, *Adv. Funct. Mater.*, 2017, **27**, 1701670.  
 108 3 E. J. Foster, E. B. Berda and E. W. Meijer, Metastable Supramolecular Polymer Nanoparticles via  
 109 Intramolecular Collapse of Single Polymer Chains, *J. Am. Chem. Soc.*, 2009, **131**, 6964–6966.  
 110 4 E. Kreutzwiesner, N. Noormofidi, F. Wiesbrock, W. Kern, K. Rametsteiner, F. Stelzer and C.  
 111 Slugovc, Contact bactericides and fungicides on the basis of amino-functionalized poly(norbornene)s,  
 112 *J. Polym. Sci. Part Polym. Chem.*, 2010, **48**, 4504–4514.  
 113
